# Supplementary material for: Use of antiretroviral therapy in households and risk of HIV acquisition in rural KwaZulu-Natal, South Africa, 2004–12: a prospective cohort study
Source: PubMed Central journal article supplement — Lancet Glob Health. 2014 Apr 27;2(4):e209–15. doi: 10.1016/S2214-109X(14)70018-X (PMC3986029; doi:10.1016/s2214-109x(14)70018-x), 2014-04-27
Supplement: mmc1.pdf [file mmc1.pdf]

## Supplementary appendix

This appendix formed part of the original submission and has been peer reviewed. We post it as supplied by the authors.

Supplement to: Vandormael A, Newell M-L, Bärnighausen T, Tanser F. Use of antiretroviral therapy in households and risk of HIV acquisition in rural KwaZulu-Natal, South Africa, 2004–12: a prospective cohort study. *Lancet Glob Health* 2014; **2**: e209–215.

|                                               | Unadjusted hazard ratio (95% CI) | p value |
|-----------------------------------------------|----------------------------------|---------|
| Opposite-sex antiretroviral therapy coverage* | 0.95 (0.91-0.99)                 | 0.007   |
| Opposite-sex HIV prevalence†                  | 1.02 (1.00-1.04)                 | 0.057   |
| Number of opposite-sex coresidents‡           | 1.08 (1.05-1.12)                 | <0.001  |
| Knows HIV status                              |                                  |         |
| Yes (reference)                               | 1.00                             | ..      |
| No                                            | 0.99 (0.89-1.10)                 | 0.880   |
| Refused                                       | 0.77 (0.64-0.94)                 | 0.008   |
| Heard about antiretroviral therapy            |                                  |         |
| Yes (reference)                               | 1.00                             | ..      |
| No                                            | 1.01 (0.91-1.12)                 | 0.811   |
| Refused                                       | 0.78 (0.65-0.93)                 | 0.006   |
| Age-sex stratum                               |                                  |         |
| Men aged 15-19 years (reference)              | 1.00                             | ..      |
| Men aged 20-24 years                          | 3.85 (2.94-5.05)                 | <0.001  |
| Men aged 25-29 years                          | 5.48 (4.04-7.43)                 | <0.001  |
| Men aged 30-34 years                          | 3.78 (2.55-5.59)                 | <0.001  |
| Men aged 35-39 years                          | 3.46 (2.27-5.26)                 | <0.001  |
| Men aged 40-44 years                          | 2.59 (1.63-4.10)                 | <0.001  |
| Men aged ≥45 years                            | 1.97 (1.26-3.09)                 | 0.003   |
| Women aged 15-19 years                        | 5.48 (4.29-7.00)                 | <0.001  |
| Women aged 20-24 years                        | 9.13 (7.15-11.65)                | <0.001  |
| Women aged 25-29 years                        | 7.66 (5.85-10.02)                | <0.001  |
| Women aged 30-34 years                        | 4.90 (3.62-6.64)                 | <0.001  |
| Women aged 35-39 years                        | 2.91 (2.10-4.04)                 | <0.001  |
| Women aged 40-44 years                        | 2.55 (1.85-3.52)                 | <0.001  |
| Women aged ≥45 years                          | 1.60 (1.16-2.22)                 | 0.005   |
| Area of residence                             |                                  |         |
| Rural (reference)                             | 1.00                             | ..      |
| Peri-urban                                    | 1.28 (1.17-1.41)                 | <0.001  |
| Urban                                         | 1.17 (0.91-1.50)                 | 0.212   |
| Household wealth quintile                     |                                  |         |
| Poorest (reference)                           | 1.00                             | ..      |
| Second poorest                                | 1.09 (0.95-1.25)                 | 0.224   |
| Third poorest                                 | 1.18 (1.03-1.35)                 | 0.017   |
| Fourth poorest                                | 1.29 (1.13-1.48)                 | <0.001  |
| Wealthiest                                    | 1.07 (0.92-1.25)                 | 0.379   |
| Changes of household residencies              |                                  |         |
| None (reference)                              | 1.00                             | ..      |
| One                                           | 1.28 (1.09-1.51)                 | 0.002   |
| Two or more                                   | 1.56 (1.14-2.15)                 | 0.006   |
| Number of seroconversions                     | 2037                             | ..      |
| Number of at-risk individuals                 | 14 505                           |         |

95% CIs are based on SEs that have been adjusted for clustering at the household level. \*Unadjusted hazard ratio represents the change in HIV seroconversion hazard for any increase of ten percentage points in household opposite-sex antiretroviral therapy coverage. †Unadjusted hazard ratio represents the change in HIV seroconversion hazard for any increase of ten percentage points in household opposite-sex HIV prevalence. ‡Unadjusted hazard ratio represents the change in HIV seroconversion hazard for an increase in household size by one opposite-sex member.

**Supplementary Table: Results of univariate analyses of HIV seroconversion hazard**
